# Supplementary material
Source: HighWire-hosted journal article supplement (https://jnm.snmjournals.org/highwire/filestream/94925/field_highwire_adjunct_files/0/170597_Supplemental_Data.pdf)
Supplement: 170597_Supplemental_Data.pdf [file 170597_Supplemental_Data.pdf]

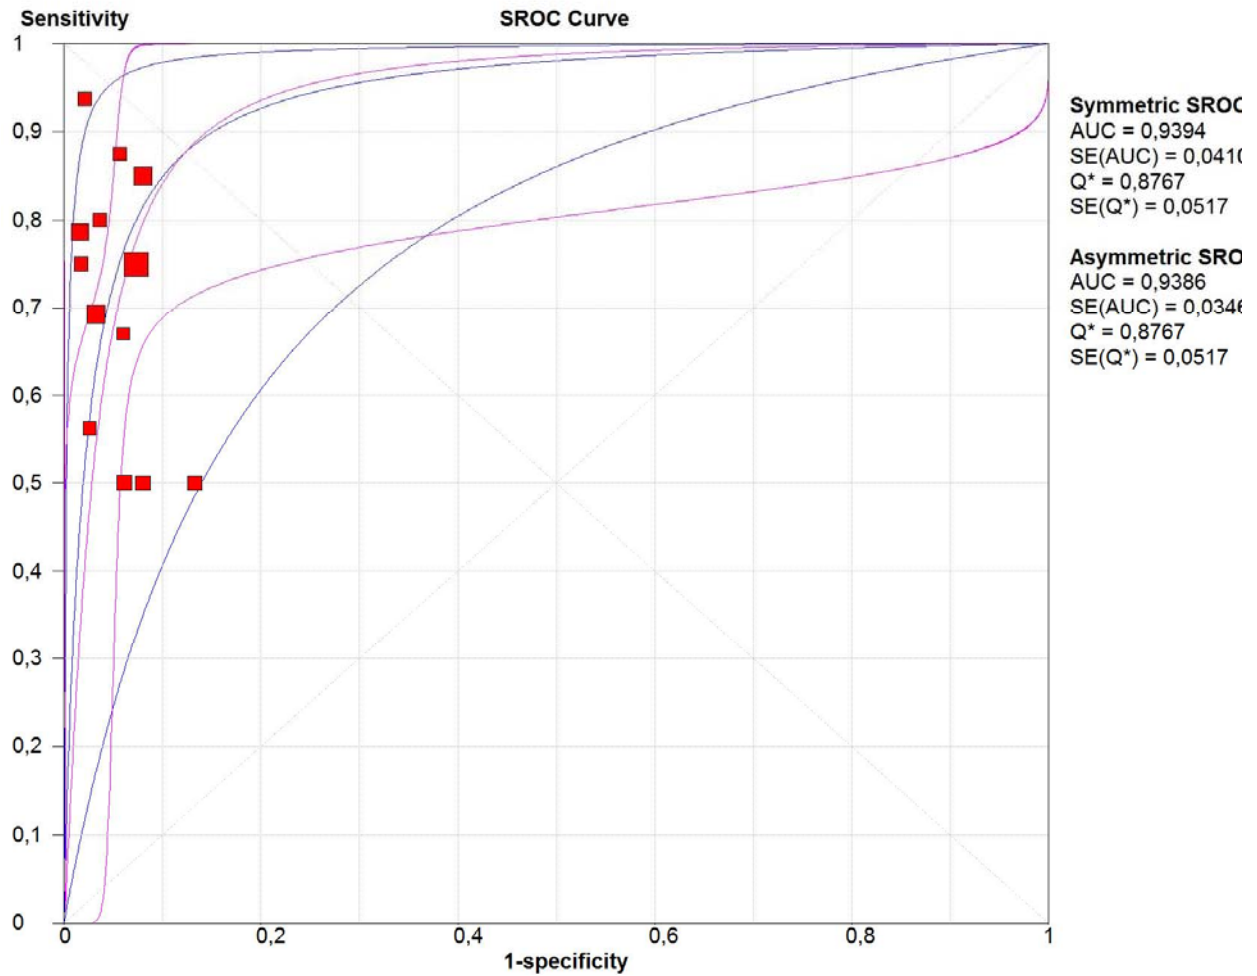

Supplemental Fig. 1: SROC's for LNM with confidence intervals: symmetric (in blue) and asymmetric (in pink).

Although sensitivity for LNM detection was low in some studies, the overall performance was acceptable, with the AUC value of almost 94%.
